# Supplementary material for: Higher Adherence to a Mediterranean Diet Is Associated with Improved Insulin Sensitivity and Selected Markers of Inflammation in Individuals Who Are Overweight and Obese without Diabetes
Source: MDPI journal article supplement (doi:10.3390/nu14204437), 2022-10-21
Supplement: s1 [file s1]

# Supplementary Materials

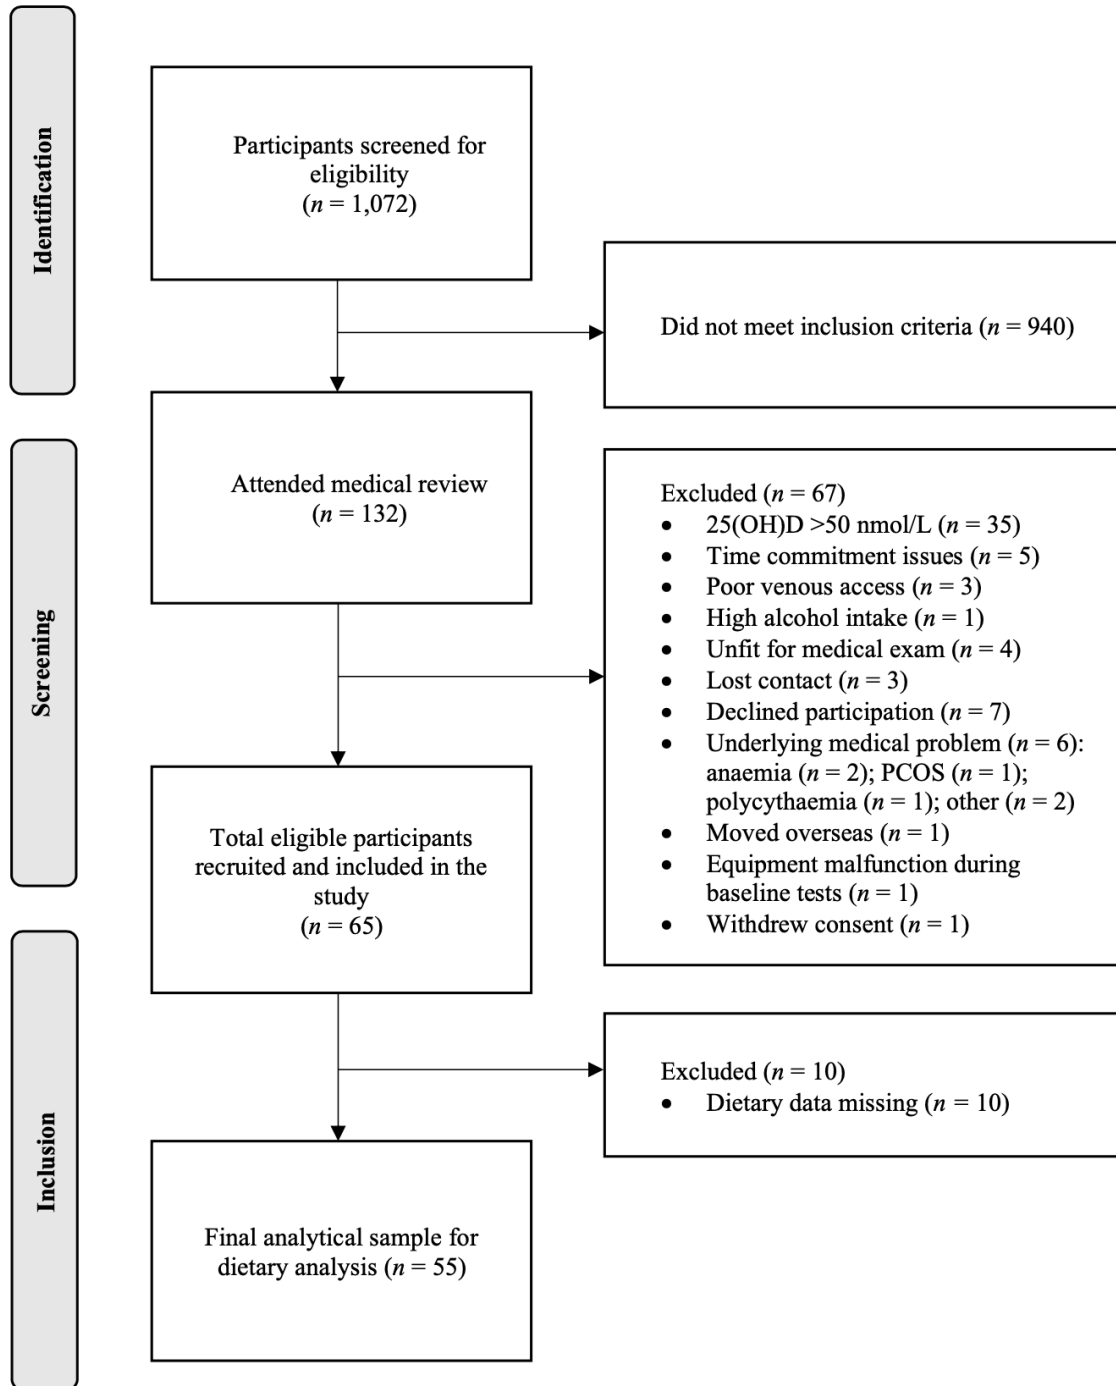

**Figure S1.** Flow diagram of subjects who participated in the study according to the STROBE statement [1].

**Table S1.** Associations between Dietary Inflammatory Index and insulin resistance, anthropometry data, and metabolic factors ( $n=55$ ).

| Parameters                                                                                          |  | Beta Coefficients, 95% Confidence Interval and P-value |          |                         |          |                         |          |                         |          |
|-----------------------------------------------------------------------------------------------------|--|--------------------------------------------------------|----------|-------------------------|----------|-------------------------|----------|-------------------------|----------|
|                                                                                                     |  | Model 1 <sup>a</sup>                                   |          | Model 2 <sup>b</sup>    |          | Model 3 <sup>c</sup>    |          | Model 4 <sup>d</sup>    |          |
|                                                                                                     |  | β (%95 CI)                                             | <i>p</i> | β (%95 CI)              | <i>p</i> | β (%95 CI)              | <i>p</i> | β (%95 CI)              | <i>p</i> |
| Weight (kg)                                                                                         |  | −0.168 (−3.126, 0.750)                                 | 0.22     | −0.163 (−0.054, 0.014)  | 0.24     |                         |          |                         |          |
|                                                                                                     |  |                                                        |          |                         |          |                         |          |                         |          |
| BMI (kg/m2)                                                                                         |  | −0.124 (−1.194, 0.453)                                 | 0.37     | −0.127 (−2.426, 0.423)  | 0.35     |                         |          |                         |          |
| Hip circumference (cm)                                                                              |  | −0.127 (−2.510, 0.924)                                 | 0.36     | −0.131 (−2.426, 0.796)  | 0.32     |                         |          |                         |          |
| Waist circumference (cm)                                                                            |  | −0.032 (−0.077, 0.061)                                 | 0.82     | 0.006 (−3.164, 0.791)   | 0.23     |                         |          |                         |          |
| Body fat (%)                                                                                        |  | −0.054 (−0.022, 0.015)                                 | 0.70     | −0.061 (−0.017, 0.008)  | 0.51     |                         |          |                         |          |
| Fat mass (%)                                                                                        |  | −0.094 (−0.075, 0.037)                                 | 0.50     | −0.098 (−0.070, 0.030)  | 0.43     |                         |          |                         |          |
| Fat free mass                                                                                       |  | −0.066 (−0.050, 0.031)                                 | 0.64     | −0.058 (−0.035, 0.018)  | 0.53     |                         |          |                         |          |
| Glucose metabolism and insulin sensitivity parameters                                               |  |                                                        |          |                         |          |                         |          |                         |          |
| Fasting blood glucose (mmol/L)                                                                      |  | 0.115 (−0.057, 0.139)                                  | 0.41     | 0.118 (−0.054, 0.138)   | 0.39     | 0.118 (−0.056, 0.139)   | 0.62     | 0.118 (−0.044, 0.128)   | 0.34     |
| 2-hour blood glucose OGTT (mmol/L)                                                                  |  | −0.159 (−0.084, 0.023)                                 | 0.25     | −0.160 (−0.085, 0.022)  | 0.25     | −0.164 (−0.086, 0.022)  | 0.24     | −0.164 (−0.082, 0.018)  | 0.22     |
| M-value for insulin sensitivity from clamp (mg/kg/min)                                              |  | 0.055 (−0.072, 0.107)                                  | 0.69     | 0.058 (−0.069, 0.106)   | 0.67     | 0.024 (−0.075, 0.092)   | 0.84     | 0.026 (−0.065, 0.082)   | 0.82     |
| Fasting Insulin at baseline (mIU/L)                                                                 |  | −0.332 (−0.210, −0.025)                                | 0.01*    | −0.333 (−0.209, −0.026) | 0.01*    | −0.326 (−0.208, −0.023) | 0.02*    | −0.326 (−0.208, −0.022) | 0.02*    |
| Insulin Area under the curve (total from 0-30 min) at baseline (mIU/L)                              |  | −0.343 (−0.290, −0.039)                                | 0.01*    | −0.342 (−0.290, −0.039) | 0.01*    | −0.343 (−0.292, −0.037) | 0.01*    | −0.343 (−0.293, −0.036) | 0.01*    |
| First phase insulin area under the curve (minutes 3-5 post glucose infusion) at baseline (mIU/L)    |  | −0.329 (−0.360, −0.041)                                | 0.02*    | −0.330 (−0.361, −0.040) | 0.02*    | −0.337 (−0.367, −0.043) | 0.01*    | −0.337 (−0.366, −0.044) | 0.01*    |
| Second phase insulin area under the curve (minutes 10-30 post glucose infusion) at baseline (mIU/L) |  | −0.321 (−0.269, −0.027)                                | 0.02*    | −0.321 (−0.269, −0.026) | 0.02*    | −0.316 (−0.269, −0.022) | 0.02*    | −0.316 (−0.270, −0.021) | 0.02*    |
| Haemodynamic parameters                                                                             |  |                                                        |          |                         |          |                         |          |                         |          |

|                                                             |                        |      |                        |      |                        |      |    |
|-------------------------------------------------------------|------------------------|------|------------------------|------|------------------------|------|----|
| SBP (mmHg)                                                  | -0.010 (-2.494, 2.320) | 0.94 | -0.007 (-2.197, 2.080) | 0.96 | 0.010 (-2.046, 2.211)  | 0.94 | NS |
| DBP (mmHg)                                                  | 0.060 (-1.304, 2.015)  | 0.67 | 0.059 (-1.250, 1.951)  | 0.66 | 0.073 (-1.169, 2.040)  | 0.59 | NS |
| Heart rate (bpm)                                            | -0.012 (-2.302, 2.104) | 0.93 | -0.015 (-2.298, 2.061) | 0.91 | -0.007 (-2.255, 2.151) | 0.96 | NS |
| Pulse pressure (systolic - diastolic blood pressure) (mmHg) | -0.069 (-2.225, 1.341) | 0.62 | -0.064 (-1.941, 1.123) | 0.59 | -0.055 (-1.899, 1.193) | 0.65 | NS |
| Mean Arterial Pressure (diastolic x2 + systolic)/3 (mmHg)   | 0.033 (-1.541, 1.958)  | 0.81 | 0.034 (-1.432, 1.862)  | 0.80 | 0.051 (-1.324, 1.960)  | 0.70 | NS |
| <b>Biochemical parameters</b>                               |                        |      |                        |      |                        |      |    |
| Total cholesterol (mmol/L)                                  | 0.035 (-0.149, 0.192)  | 0.80 | 0.038 (-0.136, 0.183)  | 0.77 | 0.020 (-0.146, 0.171)  | 0.46 | NS |
| Triglycerides (mmol/L)                                      | -0.028 (-0.102, 0.083) | 0.84 | -0.024 (-0.095, 0.079) | 0.85 | -0.042 (-0.101, 0.073) | 0.75 | NS |
| HDL (mmol/L)                                                | -0.015 (-0.053, 0.048) | 0.92 | -0.024 (-0.054, 0.046) | 0.86 | -0.026 (-0.056, 0.046) | 0.85 | NS |
| LDL (mmol/L)                                                | 0.658 (-0.095, 0.026)  | 0.51 | 0.094 (-0.087, 0.181)  | 0.49 | 0.081 (-0.095, 0.176)  | 0.55 | NS |

Beta coefficients represent change in outcome measure per 1-unit increased in DII; \*significant at  $p < 0.05$ . <sup>a</sup>Model 1: Unadjusted; <sup>b</sup>Model 2: Adjusted for age and sex; <sup>c</sup>Model 3: Adjusted for age, sex, % body fat; <sup>d</sup>Model 4: Adjusted for age, sex, % body fat and waist circumference.
